# Supplementary material for: Heteropolyacids@Silica Heterogeneous Catalysts to Produce Solketal from Glycerol Acetalization
Source: MDPI journal article supplement (doi:10.3390/nano14090733), 2024-04-23
Supplement: s1 [file s1]

# Heteropolyacids@Silica Heterogeneous Catalysts to Produce Solketal from Glycerol Acetalization

Catarina N. Dias <sup>1</sup>, Isabel C. M. S. Santos-Vieira <sup>2</sup>, Carlos R. Gomes <sup>3</sup>, Fátima Mirante <sup>1,\*</sup> and Salette S. Balula <sup>1,\*</sup>

<sup>1</sup> LAQV/REQUIMTE—Laboratório Associado para a Química Verde e Departamento de Química e Bioquímica & Faculdade de Ciências, Universidade do Porto, 4169-007 Porto, Portugal

<sup>2</sup> CICECO—Aveiro Institute of Materials, Department of Chemistry, University of Aveiro, 3810-193 Aveiro, Portugal

<sup>3</sup> CIIMAR—Centro Interdisciplinar de Investigação Marinha e Ambiental & Faculdade de Ciências, Universidade do Porto, 4169-007 Porto, Portugal

\* Correspondence: fatima.mirante@fc.up.pt (F.M.); sbalula@fc.up.pt (S.S.B.)

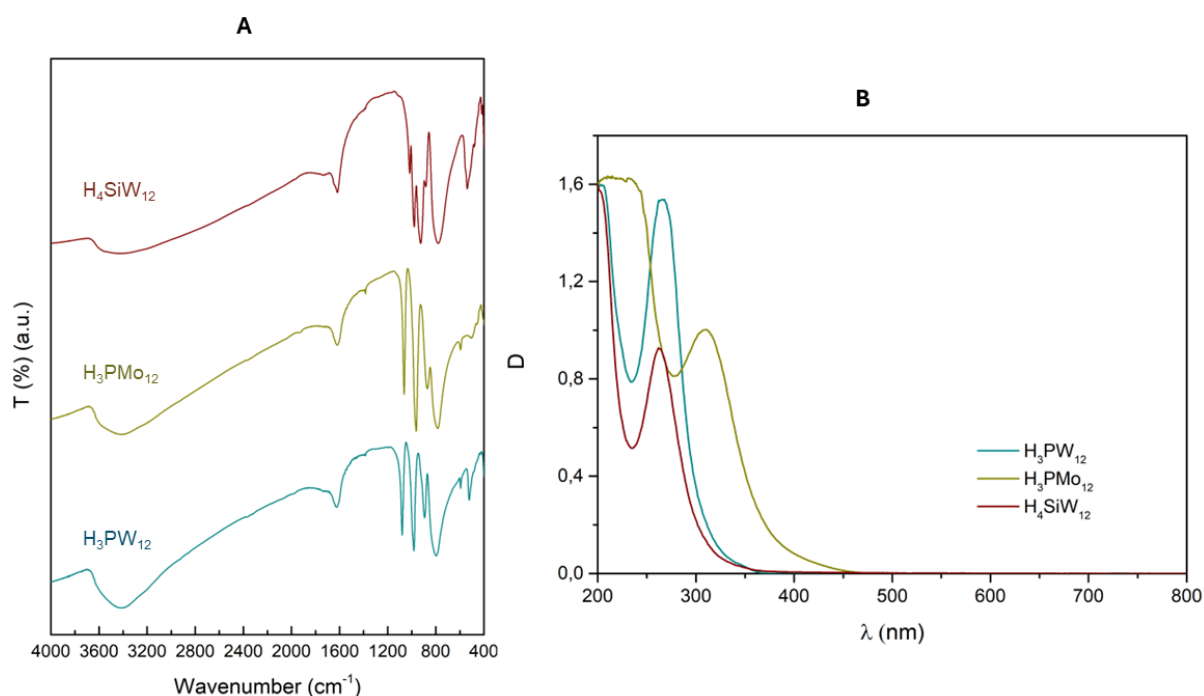

**Figure S1.** (A) FTIR spectra of  $H_3PMo_{12}$ ,  $H_3PW_{12}$  and  $H_4SiW_{12}$ . (B) UV-Vis absorption spectra of  $H_3PMo_{12}$ ,  $H_3PW_{12}$  and  $H_4SiW_{12}$ , in acetonitrile.

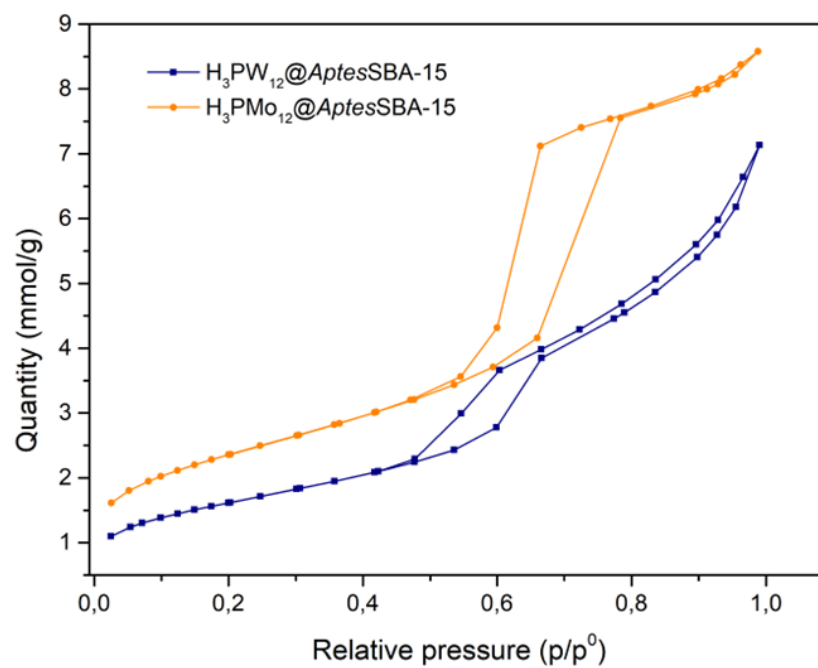

**Figure S2.** Nitrogen adsorption-desorption isotherms of the prepared  $H_3PW_{12}@AptesSBA-15$  and  $H_3PMo_{12}@AptesSBA-15$  composites.

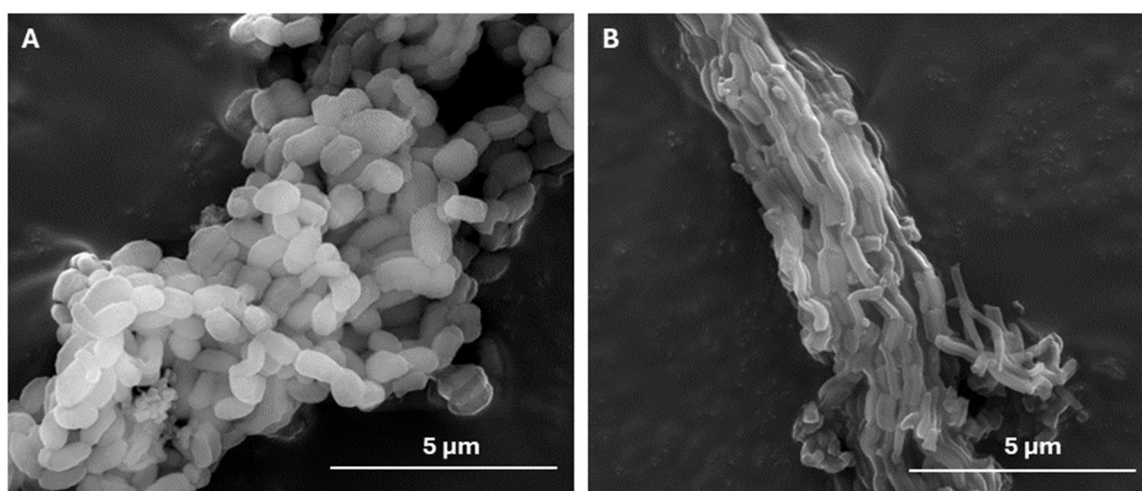

**Figure S3.** SEM images obtained for A) SBA-15 and B) *Aptes*SBA-15.

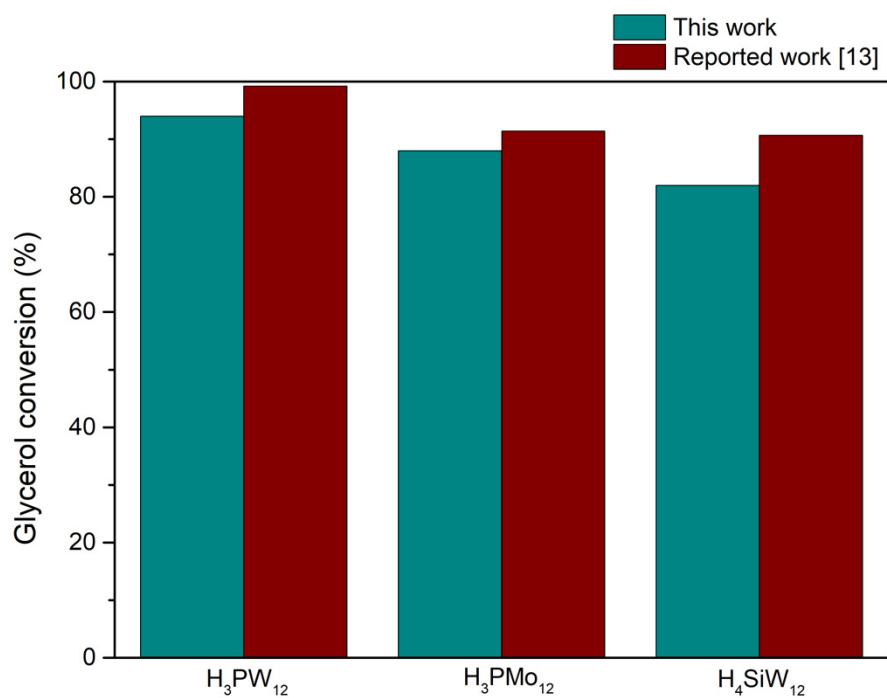

**Figure S4.** Comparison of the glycerol conversion results obtained using three different homogeneous catalysts ( $H_3PMo_{12}$ ,  $H_3PW_{12}$  and  $H_4SiW_{12}$ ). The results of the reported work of Julião et al. (reference [13] in the manuscript) were obtained with 1:15 glycerol/acetone ratio, using 3 wt% of catalyst (compared to glycerol weight), at 25 °C after 5 min of reaction. The results of this work were obtained with 1:15 glycerol/acetone ratio, using a normalized catalyst acidity of 0.373 mmol  $H^+$ /g, at 25 °C after 5 min of reaction.

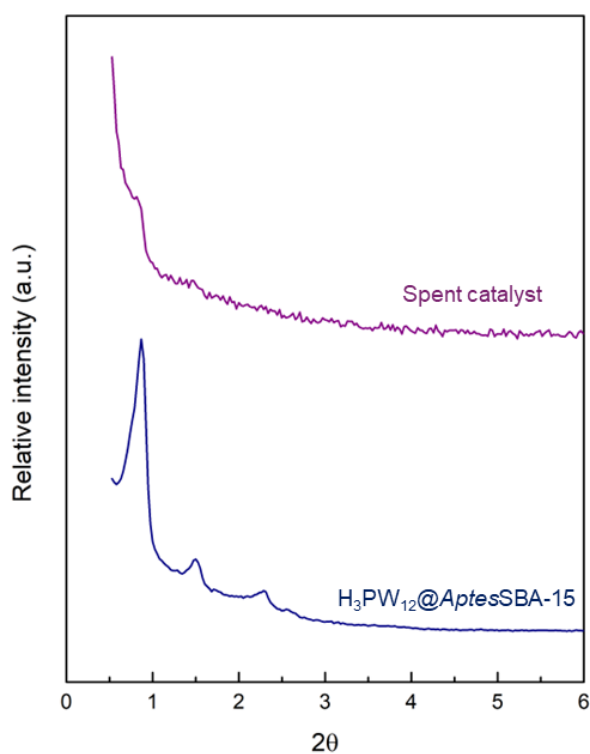

**Figure S5.** Powder XRD patterns for  $H_3PW_{12}@AptesSBA-15$  before catalysis and the spent  $H_3PW_{12}@AptesSBA-15$  catalyst after four catalytic cycles.

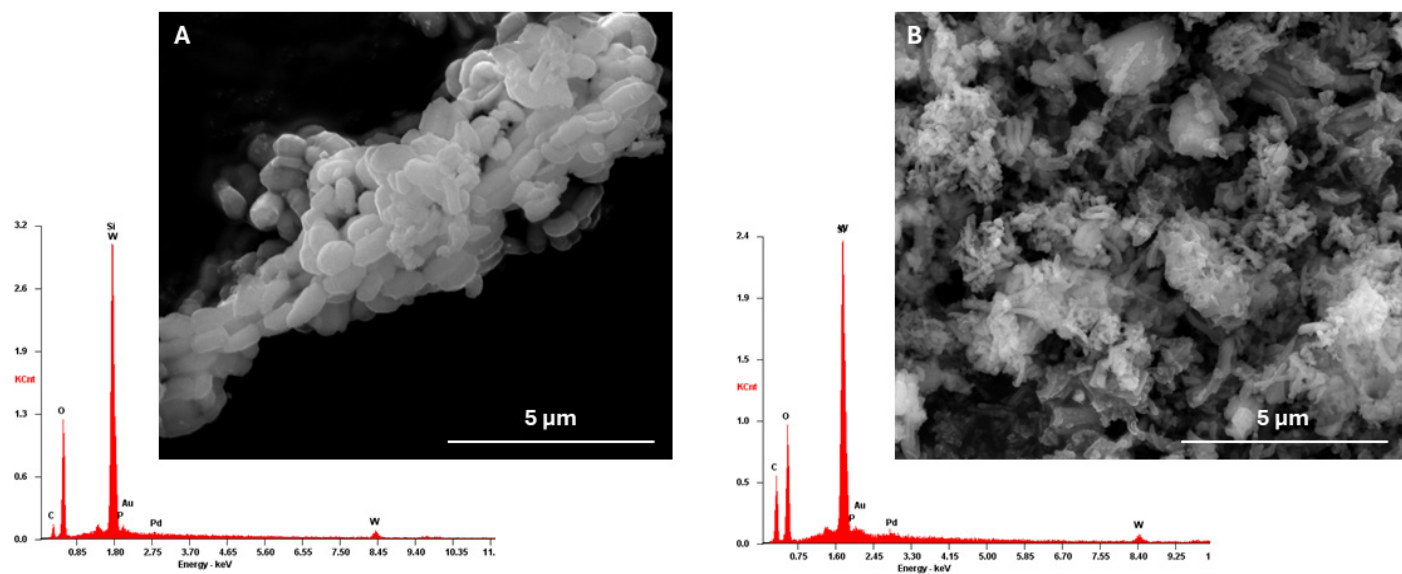

**Figure S6.** SEM images and EDS spectra obtained for A)  $\text{H}_3\text{PW}_{12}@Aptes\text{SBA-15}$  before catalytic use and B) spent  $\text{H}_3\text{PW}_{12}@Aptes\text{SBA-15}$ , after four cycles.
